# Supplementary material
Source: Springer Nature journal article supplement (https://www.springermedizin.de/resource/supplementary/12865_2012_460_MOESM1_ESM.pdf/9428006)
Supplement: MOESM1 [file 9428006]

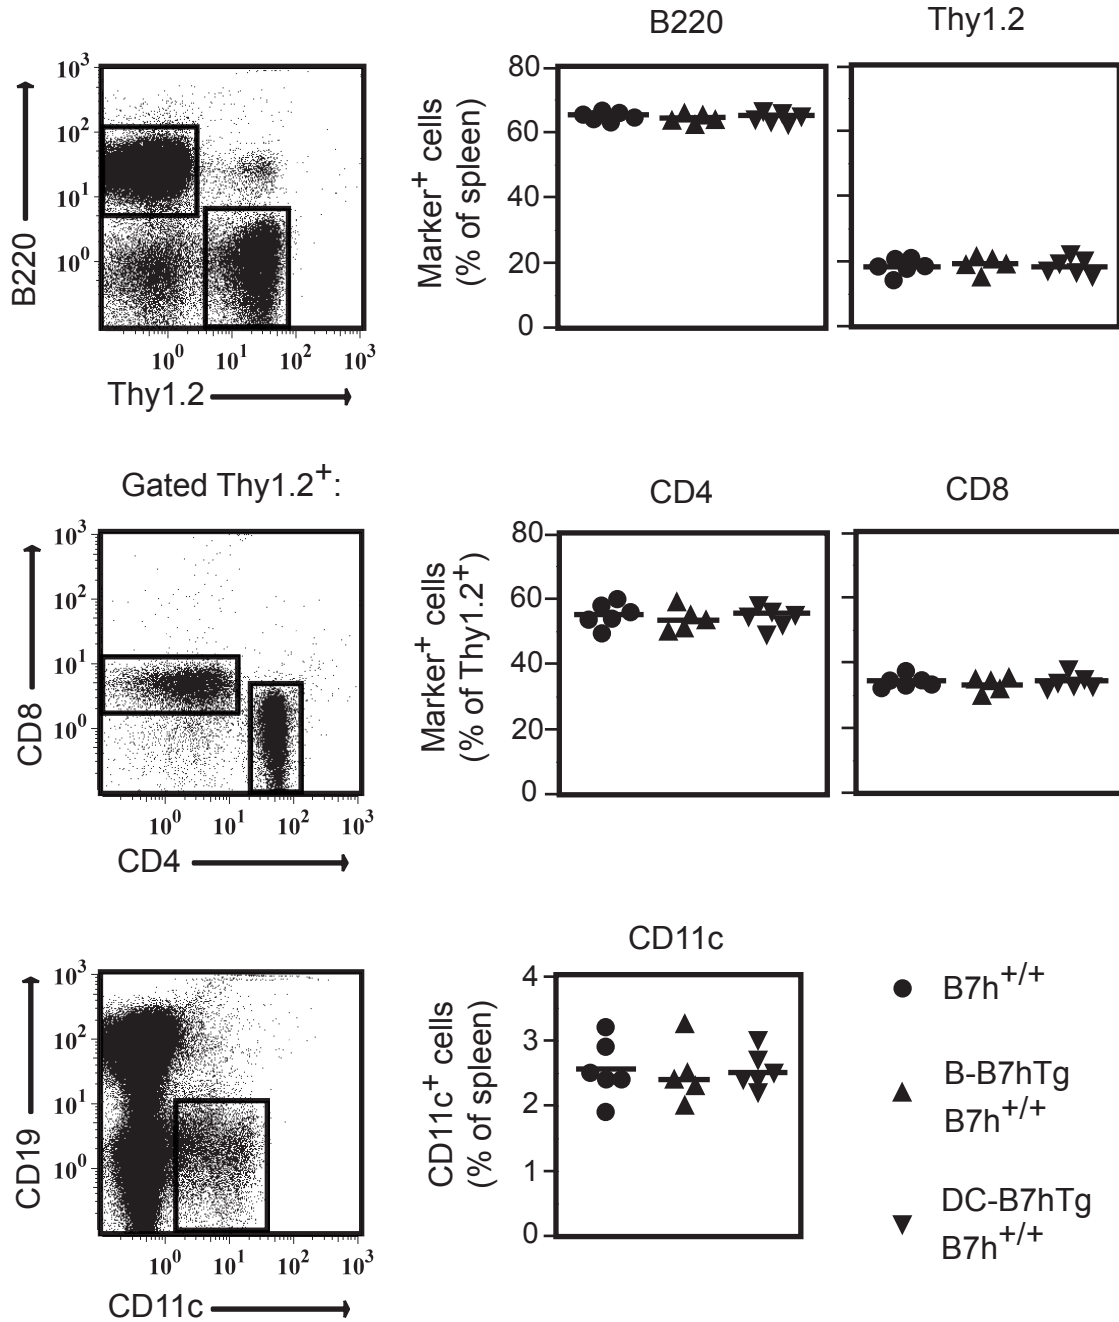

Figure S1. Normal lymphocyte populations in resting B7hTg mice. Splenic lymphocyte populations were assessed in resting B-B7hTg and DC-B7hTg animals on the B7h<sup>+/+</sup> background by flow cytometry. The number of lineage marker positive cells is plotted as a percentage of total splenocytes, with representative gating shown on the left. Each symbol represents an individual animal, with the mean of each group represented by a solid bar.
